# Supplementary material for: Compartmentalisation of enzymes for cascade reactions through biomimetic layer-by-layer mineralization
Source: Royal Society of Chemistry journal article supplement (doi:10.1039/c5tb00333d), 2015-01-01
Supplement: c5tb00333d1.pdf [file c5tb00333d1.pdf]

### Supplementary Information

**Table S1** Kinetic characteristics of the isolated recombinant enzymes. The following substrates were used: pNPGP for CelB-R<sub>6</sub>, Glucose and ADP for GKin-R<sub>6</sub>, and Glucose-6-phosphate and NADP<sup>+</sup> for G6PDH-R<sub>6</sub>. The kinetic constants of the enzymes have been determined in solution (s) and immobilized on diatom silica (i).

|                            | Yield<br>(mg L <sup>-1</sup> ) | K <sub>M</sub><br>(mM) | V <sub>max</sub><br>(μmol min <sup>-1</sup> mg <sup>-1</sup> ) | k <sub>cat</sub><br>(min <sup>-1</sup> ) | k <sub>cat</sub> /K <sub>M</sub><br>(mM <sup>-1</sup> min <sup>-1</sup> ) |
|----------------------------|--------------------------------|------------------------|----------------------------------------------------------------|------------------------------------------|---------------------------------------------------------------------------|
| <b>CelB-R<sub>6</sub></b>  | 76                             | 1.24 ± 0.04 (s)        | 119.8 ± 4.2 (s)                                                | 6718 ± 236 (s)                           | 5654 ± 388 (s)                                                            |
|                            |                                | 1.45 ± 0.08 (i)        | 32.62 ± 0.4(i)                                                 | 1812 ± 20 (i)                            | 1209 ± 60 (i)                                                             |
| <b>GKin-R<sub>6</sub></b>  | 73                             | 5.21 ± 0.2 (s)         | 8.16 ± 0.07 (s)                                                | 424 ± 3 (s)                              | 80.5 ± 3 (s)                                                              |
|                            |                                | 5.23 ± 0.4(i)          | 6.34 ± 0.3 (i)                                                 | 345 ± 15 (i)                             | 63.6 ± 2.5 (i)                                                            |
| <b>G6PDH-R<sub>6</sub></b> | 46                             | 1.76 ± 0.05 (s)        | 2.57 ± 0.04 (s)                                                | 133 ± 3 (s)                              | 72.5 ± 3 (s)                                                              |
|                            |                                | 1.67 ± 0.1 (i)         | 1.32 ± 0.02 (i)                                                | 71.2 ± 1 (i)                             | 40.0 ± 3 (i)                                                              |

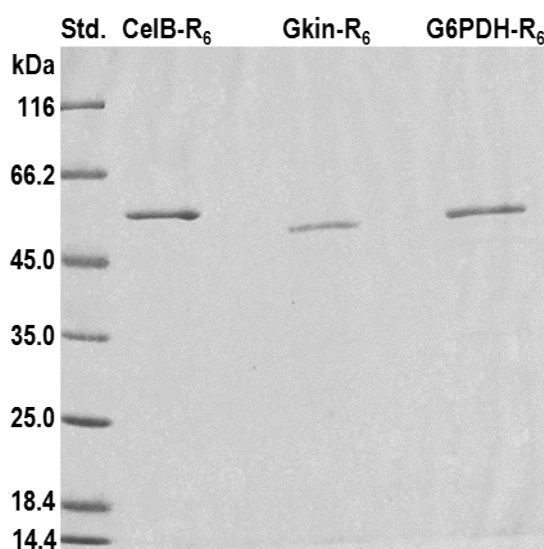

**Fig. S1** SDS-PAGE analysis of the isolated enzymes. CelB-R<sub>6</sub> (3.3 μg), GKin-R<sub>6</sub> (2.1 μg), and G6PDH-R<sub>6</sub> (3.1 μg) were loaded. The expected molecular masses of the recombinant enzymes were 58 kDa for CelB-R<sub>6</sub>, 47 kDa for GKin-R<sub>6</sub>, and 55 kDa for G6PDH-R<sub>6</sub>. Std. = molecular mass standard proteins. The SDS-PAG contained 11 % acrylamide and was stained with Coomassie Blue.

**Table S2** Zeta potentials of the recombinant enzymes at pH 7.0.

| Enzyme               | Zeta Potential<br>(mV) |
|----------------------|------------------------|
| CelB                 | -17.5 ± 1.5            |
| CelB-R <sub>6</sub>  | -10.9 ± 1.3            |
| ADPGK-R <sub>6</sub> | -9.4 ± 1.8             |
| G6PDH-R <sub>6</sub> | -8.7 ± 0.8             |

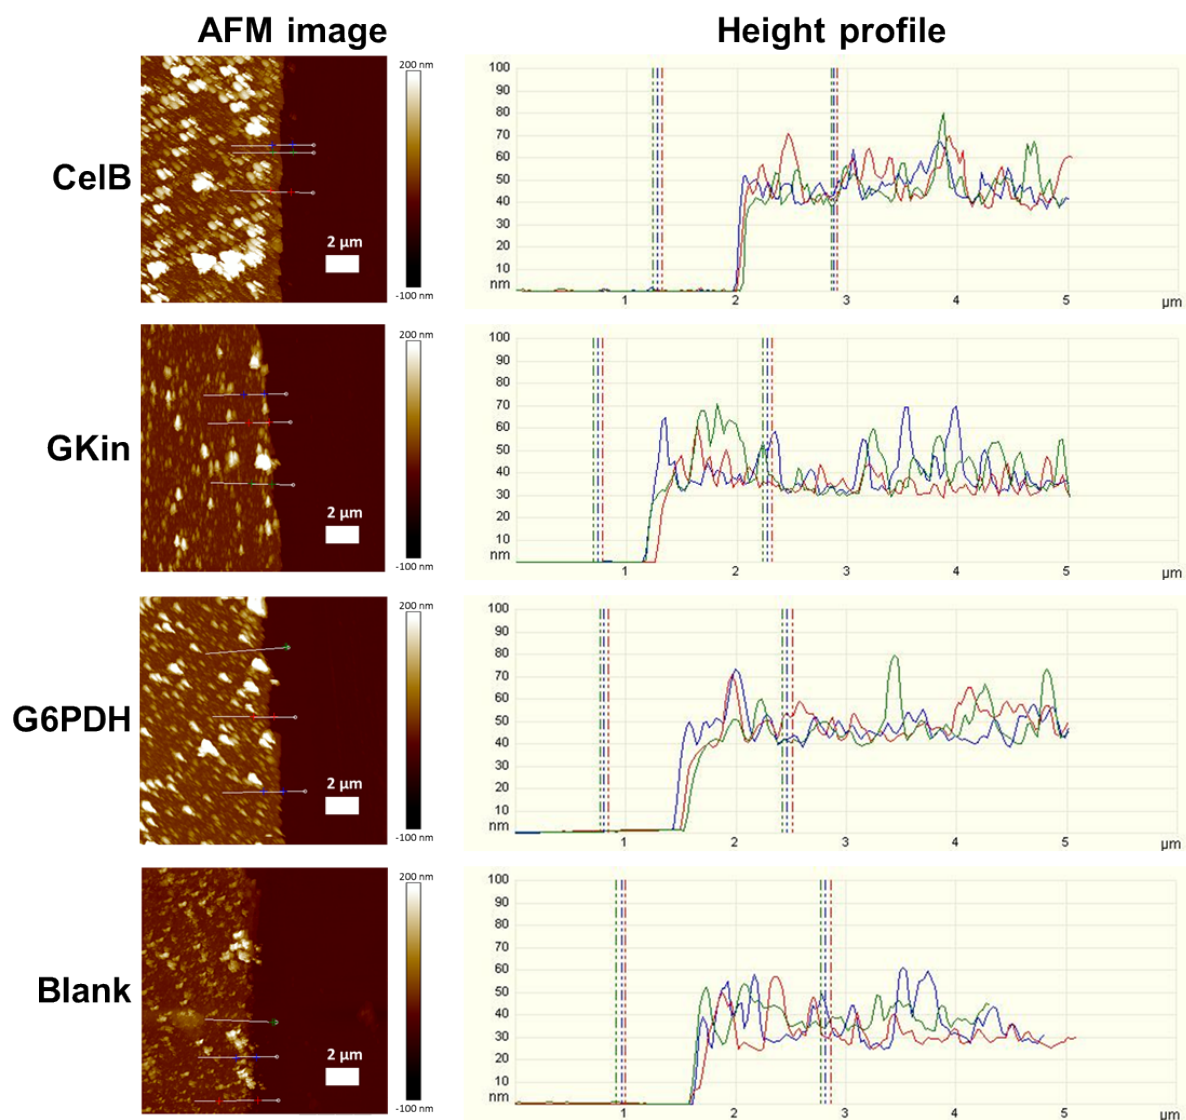

**Fig. S2** AFM measurements of silica-enzyme films deposited on a silicon wafer. Representative AFM images and height profiles collected during step height measurement for the three enzyme bearing coatings and the enzyme-free sample (Blank). In the AFM images the enzyme-protamine-silica<sub>2</sub> film is on the left part and the selectively removed trench is located on the right part.
